# Supplementary material
Source: PubMed Central journal article supplement (PMC11336039)
Supplement: 11357_2024_1180_MOESM1_ESM.pdf [file 11357_2024_1180_MOESM1_ESM.pdf]

## Supplementary materials

Trends in Prevalence, Mortality, and Risk Factors of Dementia Among the Oldest-Old Adults in the United States: the Role of the Obesity Epidemic

Journal name: Geroscience

Xueshan Cao, PhD<sup>1†</sup>, Minmin Wang, PhD<sup>2,3†</sup>, Mengge Zhou, PhD<sup>4†</sup>, Yuanqi Mi, ScM<sup>5</sup>, Vince Fazekas-Pongor, MD, PhD<sup>6</sup>, David Major, MD<sup>6</sup>, Andrea Lehoczki, MD, PhD<sup>6,7,8</sup>, Yang Guo, PhD<sup>9\*</sup>

<sup>1</sup> Department of Occupational Health and Environmental Health, School of Public Health, Hebei Medical University, Shijiazhuang, Hebei, China; Hebei Province Key Laboratory of Environment and Human Health, Shijiazhuang, Hebei, China.

<sup>2</sup> Department of Global Health, School of Public Health, Peking University, Beijing, China.

<sup>3</sup> Institute for Global Health and Development, Peking University, Beijing, China.

<sup>4</sup> Department of Epidemiology and Biostatistics, Institute of Basic Medical Sciences Chinese Academy of Medical Sciences, School of Basic Medicine, Peking Union Medical College, Beijing, China.

<sup>5</sup> Department of Epidemiology, Bloomberg School of Public Health, Johns Hopkins University, Baltimore, USA.

<sup>6</sup> Department of Public Health, Semmelweis University, Budapest, Hungary.

<sup>7</sup> Doctoral College, Health Sciences Program, Semmelweis University, Budapest, Hungary.

<sup>8</sup> Department of Haematology and Stem Cell Transplantation, National Institute for Haematology and Infectious Diseases, South Pest Central Hospital, Budapest, Hungary.

<sup>9</sup> Department of Epidemiology and Statistics, School of Public Health, Hebei Medical University, Shijiazhuang, Hebei, China; Hebei Province Key Laboratory of Environment and Human Health, Shijiazhuang, Hebei, China.

\* Address correspondence to: Yang Guo, PhD, Department of Epidemiology and Statistics, School of Public Health, Hebei Medical University; Hebei Province Key Laboratory of Environment and Human Health. 361 East Zhongshan Road, 050017, Shijiazhuang, Hebei, China. Email: yangguo@hebmue.edu.cn

†These authors contributed equally.

## Contents

| Title                                                                                                                                                                                  | Page |
|----------------------------------------------------------------------------------------------------------------------------------------------------------------------------------------|------|
| <b>eFigure 1.</b> Trends of male-to-female ratios in dementia prevalent cases and rates among US oldest-old adults in the four age groups from 1990 to 2019                            | 3    |
| <b>eFigure 2.</b> Trends of male-to-female ratios in dementia mortality numbers and rates among US oldest-old adults in the four age groups from 1990 to 2019                          | 4    |
| <b>eFigure 3.</b> PAFs of dementia mortality due to risk factors among US oldest-old adults in the four age groups from 1990 to 2019                                                   | 5    |
| <b>eFigure 4.</b> Attributable numbers of dementia mortality due to risk factors among US oldest-old adults in the four age groups from 1990 to 2019                                   | 6    |
| <b>eFigure 5.</b> Trends of male-to-female ratios in attributable number of dementia mortality due to risk factors among US oldest-old adults in the four age groups from 1990 to 2019 | 7    |
| <b>eTable 1.</b> Decomposition analysis on changes in dementia prevalence among US oldest-old adults from 1990 to 2019                                                                 | 8    |
| <b>eTable 2.</b> Decomposition analysis on changes in dementia mortality among US oldest-old adults from 1990 to 2019                                                                  | 9    |
| <b>eTable 3.</b> Predicted dementia prevalent cases among US oldest-old adults in the four age groups from 2020 to 2030                                                                | 10   |
| <b>eTable 4.</b> Predicted dementia prevalence rates among US oldest-old adults in the four age groups from 2020 to 2030                                                               | 14   |
| <b>eTable 5.</b> Predicted dementia mortality numbers among US oldest-old adults in the four age groups from 2020 to 2030                                                              | 18   |
| <b>eTable 6.</b> Predicted dementia mortality rates among US oldest-old adults in the four age groups from 2020 to 2030                                                                | 22   |
| <b>Supplementary method</b>                                                                                                                                                            | 26   |
| <b>References</b>                                                                                                                                                                      | 28   |

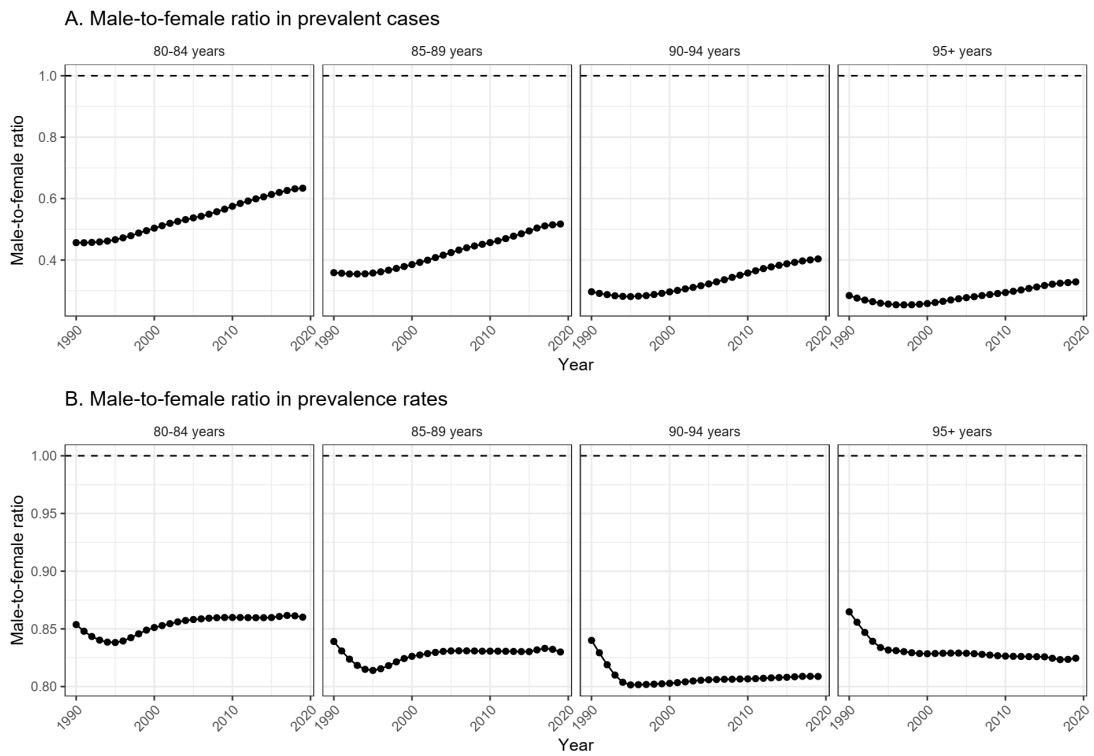

**eFigure 1.** Trends of male-to-female ratios in dementia prevalent cases and rates among US oldest-old adults in the four age groups from 1990 to 2019. A. Trends of male-to-female ratios in prevalent cases. B. Trends of male-to-female ratios in prevalence rates.

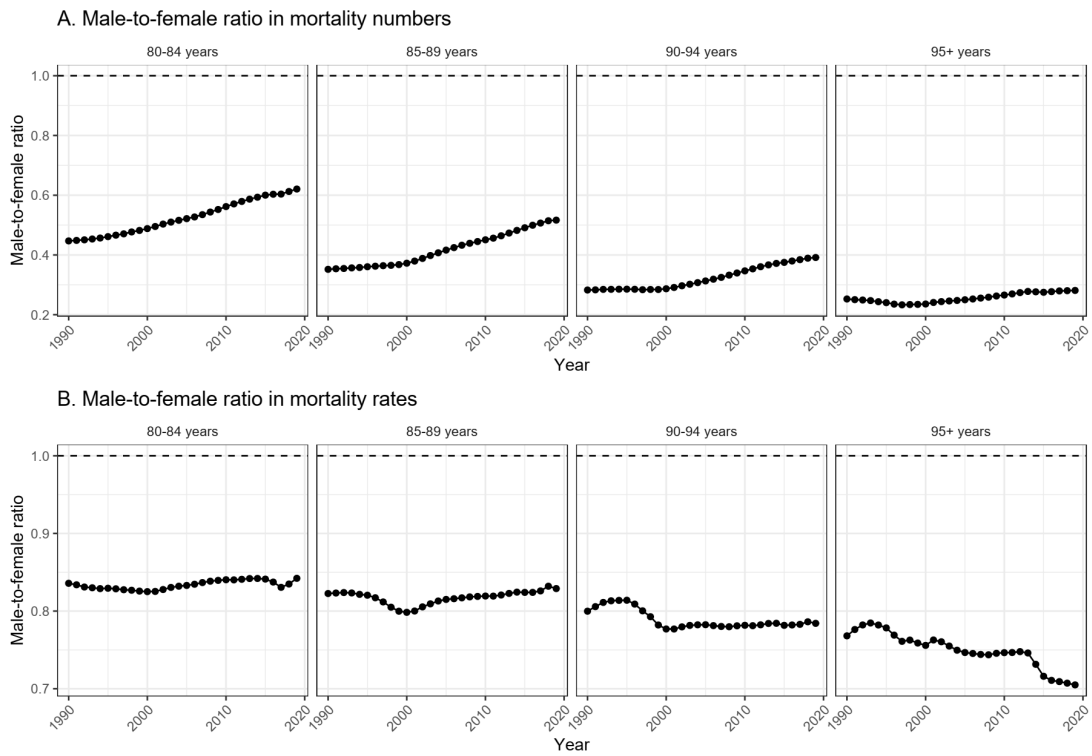

**eFigure 2.** Trends of male-to-female ratios in dementia mortality numbers and rates among US oldest-old adults in the four age groups from 1990 to 2019. A. Trends of male-to-female ratios in mortality numbers. B. Trends of male-to-female ratios in mortality rates.

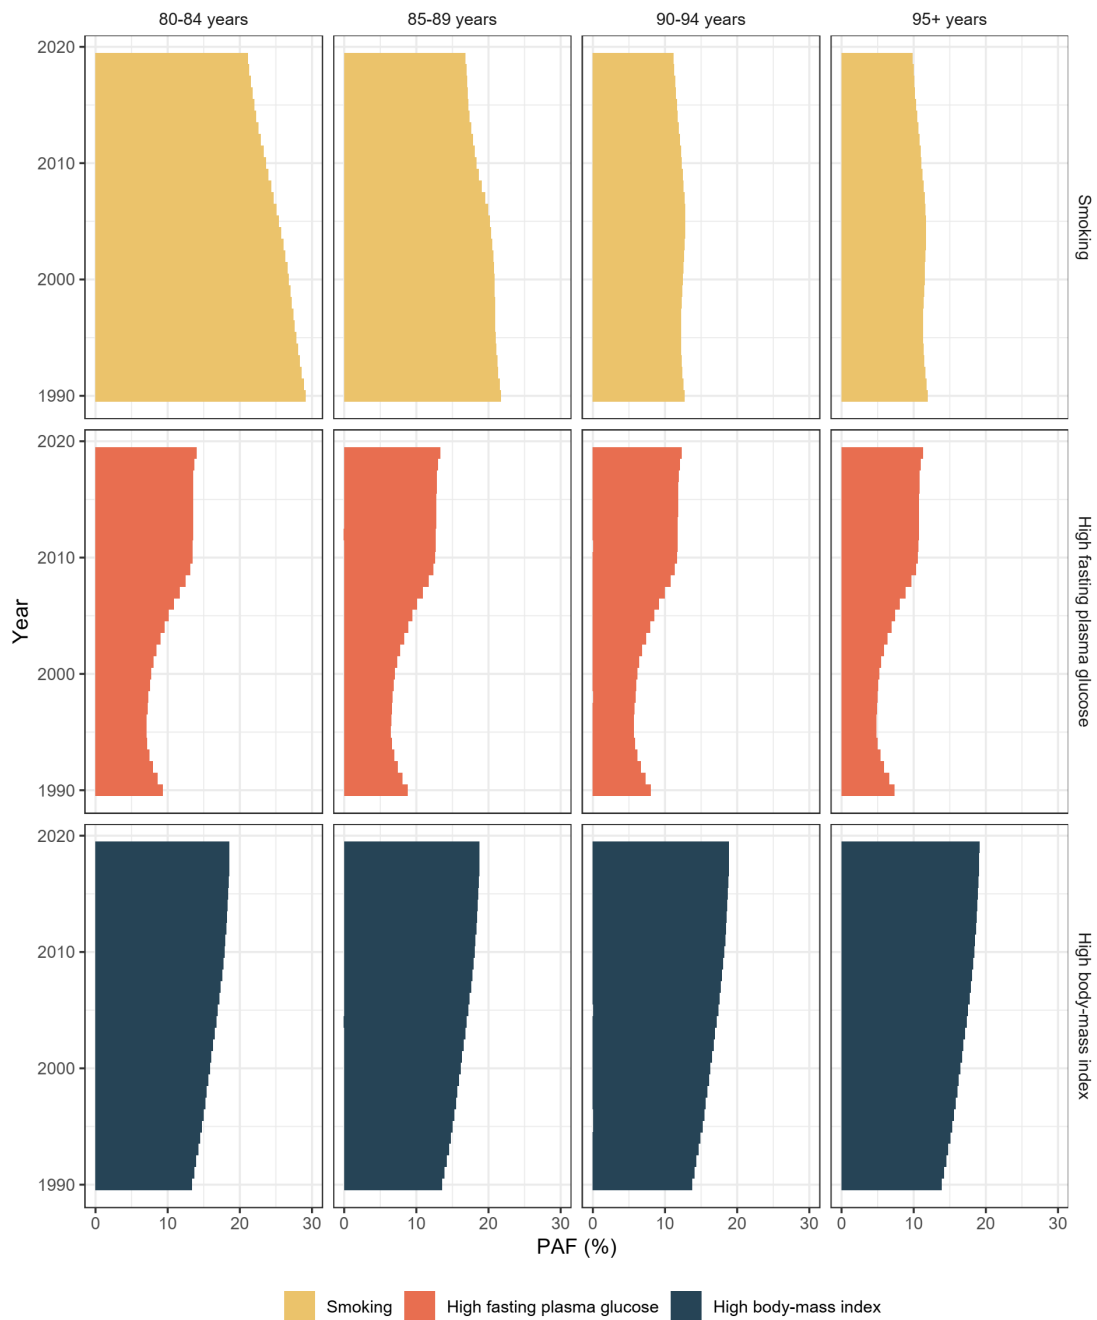

**Figure 3.** PAFs of dementia mortality due to risk factors among US oldest-old adults in the four age groups from 1990 to 2019. The enrolled risk factors in the present study: smoking, high fasting plasma glucose, and high body mass index (BMI). The PAF refers to the proportion of dementia that would be reduced if the risk factor's historical exposure level had been reduced to the counterfactual level of the theoretical minimum risk exposure level. PAF = population-attributable fractions.

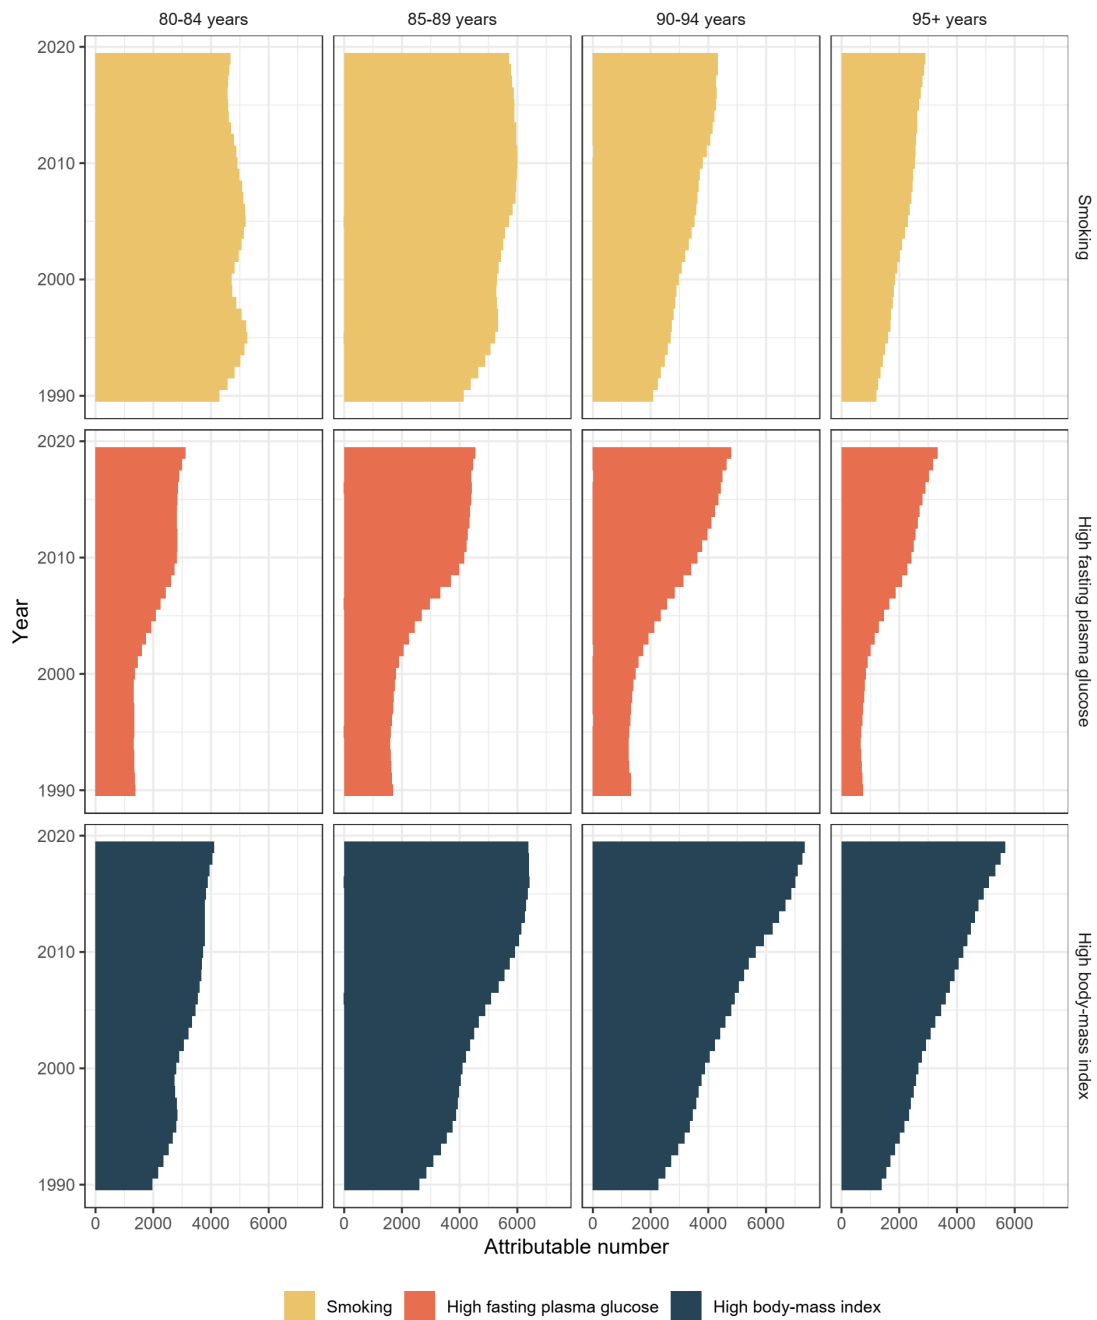

**eFigure 4.** Attributable numbers of dementia mortality due to risk factors among US oldest-old adults in the four age groups from 1990 to 2019. The enrolled risk factors in the present study: smoking, high fasting plasma glucose, and high body-mass index (BMI). The attributable number refers to the absolute number of dementia cases attributable to the risk factor.

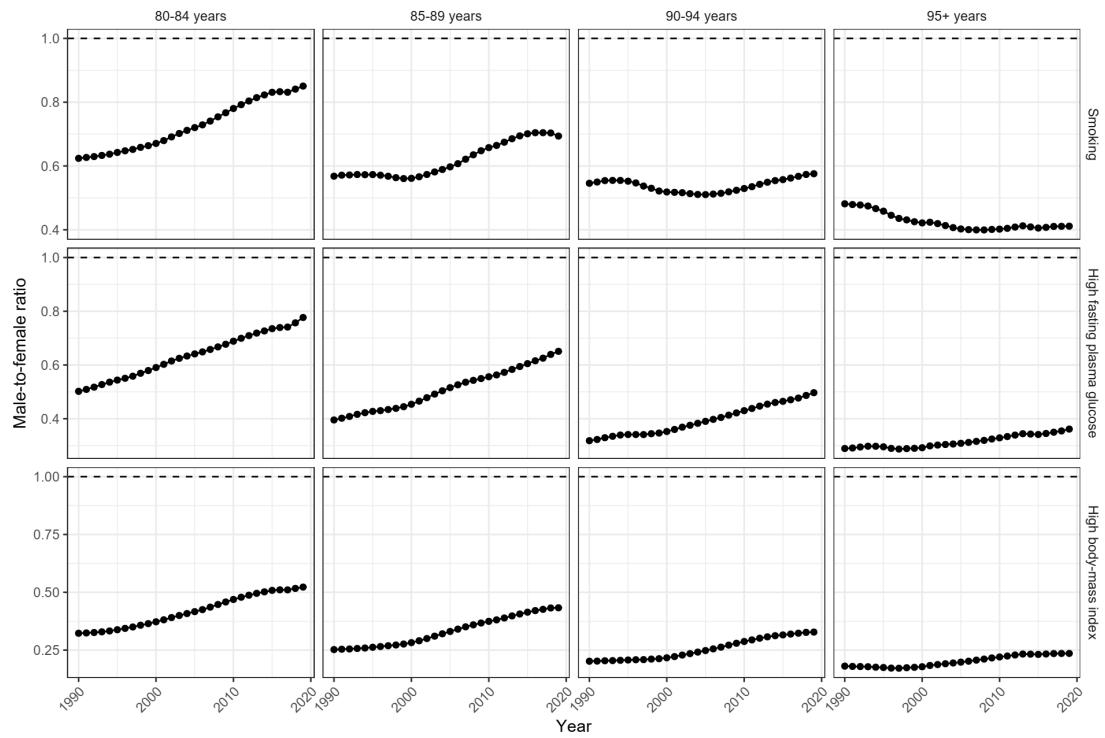

**Figure 5.** Trends of male-to-female ratios in attributable number of dementia mortality due to risk factors among US oldest-old adults in the four age groups from 1990 to 2019. The enrolled risk factors in the present study: smoking, high fasting plasma glucose, and high body mass index (BMI). The attributable number refers to the absolute number of dementia cases attributable to the risk factor.

**eTable 1. Decomposition analysis on changes in dementia prevalence among US oldest-old adults from 1990 to 2019**

|        | Overall changes | Absolute changes due to individual factors<br>(contribution proportions) |                   |                        |
|--------|-----------------|--------------------------------------------------------------------------|-------------------|------------------------|
|        |                 | Aging                                                                    | Population growth | Epidemiological change |
| Male   | 539476          | 53417 (9.9%)                                                             | 506450 (93.88%)   | -20391 (-3.78%)        |
| Female | 829859          | 151232 (18.22%)                                                          | 708896 (85.42%)   | -30269 (-3.65%)        |

The decomposition analysis used the Das Gupta's decomposition method to understand the underlying factors (i.e., aging of population, population growth, and epidemiological change) that contribute to the alterations of prevalence and their contribution proportion. The contribution of each factor to the total changes in prevalence was defined by the effect of one factor changing while the other factors were held constant. The proportions of each factor contributed to the total changes were calculated using the following formula: the absolute value of proportion = absolute value of change driven by the factor / absolute value of the overall change. The proportion was positive when the change driven by the factor was positive; otherwise, the proportion was negative.



**eTable 2. Decomposition analysis on changes in dementia mortality among US oldest-old adults from 1990 to 2019**

|        | Overall changes | Absolute changes due to individual factors<br>(contribution proportions) |                   |                        |
|--------|-----------------|--------------------------------------------------------------------------|-------------------|------------------------|
|        |                 | Aging                                                                    | Population growth | Epidemiological change |
| Male   | 22289           | 3658 (16.41%)                                                            | 18761 (84.17%)    | -130 (-0.58%)          |
| Female | 41894           | 11563 (27.6%)                                                            | 29404 (70.19%)    | 927 (2.21%)            |

The decomposition analysis used the Das Gupta's decomposition method to understand the underlying factors (i.e., aging of population, population growth, and epidemiological change) that contribute to the alterations of mortality and their contribution proportion. The contribution of each factor to the total changes in mortality was defined by the effect of one factor changing while the other factors were held constant. The proportions of each factor contributed to the total changes were calculated using the following formula: the absolute value of proportion = absolute value of change driven by the factor / absolute value of the overall change. The proportion was positive when the change driven by the factor was positive; otherwise, the proportion was negative.

**eTable 3. Predicted dementia prevalent cases among US oldest-old adults in the four age groups from 2020 to 2030**

| Age groups  | Sex    | Year | Predicted values<br>(95% CI) |
|-------------|--------|------|------------------------------|
| 80-84 years | Both   | 2020 | 918135 (880450-955820)       |
| 80-84 years | Both   | 2021 | 949557 (895782-1003333)      |
| 80-84 years | Both   | 2022 | 986693 (910418-1062968)      |
| 80-84 years | Both   | 2023 | 1032503 (927345-1137662)     |
| 80-84 years | Both   | 2024 | 1087329 (946453-1228206)     |
| 80-84 years | Both   | 2025 | 1147706 (964038-1331374)     |
| 80-84 years | Both   | 2026 | 1210535 (976907-1444163)     |
| 80-84 years | Both   | 2027 | 1273024 (982408-1563639)     |
| 80-84 years | Both   | 2028 | 1337905 (982298-1693512)     |
| 80-84 years | Both   | 2029 | 1407513 (977591-1837435)     |
| 80-84 years | Both   | 2030 | 1478688 (965262-1992114)     |
| 80-84 years | Female | 2020 | 559877 (537643-582111)       |
| 80-84 years | Female | 2021 | 577380 (545925-608836)       |
| 80-84 years | Female | 2022 | 598331 (554029-642633)       |
| 80-84 years | Female | 2023 | 624330 (563608-685052)       |
| 80-84 years | Female | 2024 | 655495 (574567-736423)       |
| 80-84 years | Female | 2025 | 689906 (584868-794945)       |
| 80-84 years | Female | 2026 | 725830 (592727-858933)       |
| 80-84 years | Female | 2027 | 761712 (596658-926766)       |
| 80-84 years | Female | 2028 | 799255 (597791-1000720)      |
| 80-84 years | Female | 2029 | 839748 (596691-1082805)      |
| 80-84 years | Female | 2030 | 881148 (591451-1170845)      |
| 80-84 years | Male   | 2020 | 358257 (342807-373708)       |
| 80-84 years | Male   | 2021 | 372177 (349857-394496)       |
| 80-84 years | Male   | 2022 | 388362 (356389-420335)       |
| 80-84 years | Male   | 2023 | 408173 (363737-452610)       |
| 80-84 years | Male   | 2024 | 431834 (371886-491783)       |
| 80-84 years | Male   | 2025 | 457800 (379170-536430)       |
| 80-84 years | Male   | 2026 | 484705 (384179-585230)       |
| 80-84 years | Male   | 2027 | 511312 (385750-636873)       |
| 80-84 years | Male   | 2028 | 538650 (384507-692792)       |
| 80-84 years | Male   | 2029 | 567765 (380900-754630)       |
| 80-84 years | Male   | 2030 | 597540 (373811-821269)       |
| 85-89 years | Both   | 2020 | 895649 (863564-927735)       |
| 85-89 years | Both   | 2021 | 902936 (859681-946190)       |
| 85-89 years | Both   | 2022 | 917121 (857867-976375)       |
| 85-89 years | Both   | 2023 | 937271 (857673-1016869)      |
| 85-89 years | Both   | 2024 | 962616 (858222-1067010)      |

---

|             |        |      |                          |
|-------------|--------|------|--------------------------|
| 85-89 years | Both   | 2025 | 993827 (859577-1128077)  |
| 85-89 years | Both   | 2026 | 1031154 (861513-1200796) |
| 85-89 years | Both   | 2027 | 1074659 (863472-1285845) |
| 85-89 years | Both   | 2028 | 1128338 (867775-1388902) |
| 85-89 years | Both   | 2029 | 1192972 (873676-1512268) |
| 85-89 years | Both   | 2030 | 1264192 (876598-1651786) |
| 85-89 years | Female | 2020 | 584658 (564395-604922)   |
| 85-89 years | Female | 2021 | 586450 (559509-613390)   |
| 85-89 years | Female | 2022 | 593145 (556638-629652)   |
| 85-89 years | Female | 2023 | 603911 (555258-652563)   |
| 85-89 years | Female | 2024 | 617811 (554418-681205)   |
| 85-89 years | Female | 2025 | 635313 (554235-716392)   |
| 85-89 years | Female | 2026 | 656657 (554688-758626)   |
| 85-89 years | Female | 2027 | 681988 (555561-808415)   |
| 85-89 years | Female | 2028 | 713468 (558115-868821)   |
| 85-89 years | Female | 2029 | 751375 (561835-940915)   |
| 85-89 years | Female | 2030 | 793246 (564123-1022370)  |
| 85-89 years | Male   | 2020 | 310991 (299169-322813)   |
| 85-89 years | Male   | 2021 | 316486 (300173-332800)   |
| 85-89 years | Male   | 2022 | 323976 (301229-346722)   |
| 85-89 years | Male   | 2023 | 333360 (302414-364306)   |
| 85-89 years | Male   | 2024 | 344805 (303805-385805)   |
| 85-89 years | Male   | 2025 | 358514 (305343-411685)   |
| 85-89 years | Male   | 2026 | 374497 (306824-442170)   |
| 85-89 years | Male   | 2027 | 392671 (307912-477430)   |
| 85-89 years | Male   | 2028 | 414870 (309660-520081)   |
| 85-89 years | Male   | 2029 | 441597 (311841-571353)   |
| 85-89 years | Male   | 2030 | 470946 (312475-629417)   |
| 90-94 years | Both   | 2020 | 691585 (666985-716185)   |
| 90-94 years | Both   | 2021 | 690041 (657103-722978)   |
| 90-94 years | Both   | 2022 | 690631 (646041-735222)   |
| 90-94 years | Both   | 2023 | 691094 (632399-749789)   |
| 90-94 years | Both   | 2024 | 691698 (616834-766563)   |
| 90-94 years | Both   | 2025 | 695506 (602214-788797)   |
| 90-94 years | Both   | 2026 | 703759 (589629-817889)   |
| 90-94 years | Both   | 2027 | 716783 (579098-854468)   |
| 90-94 years | Both   | 2028 | 734619 (570190-899048)   |
| 90-94 years | Both   | 2029 | 757489 (562410-952568)   |
| 90-94 years | Both   | 2030 | 785566 (555072-1016059)  |
| 90-94 years | Female | 2020 | 488188 (471318-505057)   |
| 90-94 years | Female | 2021 | 483587 (461328-505847)   |
| 90-94 years | Female | 2022 | 481694 (451866-511523)   |

---

---

|             |        |      |                        |
|-------------|--------|------|------------------------|
| 90-94 years | Female | 2023 | 480044 (441079-519009) |
| 90-94 years | Female | 2024 | 477916 (428605-527228) |
| 90-94 years | Female | 2025 | 477756 (416780-538731) |
| 90-94 years | Female | 2026 | 480764 (406696-554833) |
| 90-94 years | Female | 2027 | 487477 (398637-576316) |
| 90-94 years | Female | 2028 | 497557 (392019-603095) |
| 90-94 years | Female | 2029 | 510717 (386211-635223) |
| 90-94 years | Female | 2030 | 527182 (380901-673463) |
| 90-94 years | Male   | 2020 | 203398 (195667-211128) |
| 90-94 years | Male   | 2021 | 206453 (195775-217131) |
| 90-94 years | Male   | 2022 | 208937 (194175-223699) |
| 90-94 years | Male   | 2023 | 211050 (191319-230780) |
| 90-94 years | Male   | 2024 | 213782 (188229-239335) |
| 90-94 years | Male   | 2025 | 217750 (185434-250066) |
| 90-94 years | Male   | 2026 | 222995 (182933-263057) |
| 90-94 years | Male   | 2027 | 229306 (180461-278151) |
| 90-94 years | Male   | 2028 | 237062 (178171-295953) |
| 90-94 years | Male   | 2029 | 246772 (176199-317346) |
| 90-94 years | Male   | 2030 | 258383 (174170-342597) |
| 95+ years   | Both   | 2020 | 379905 (366420-393391) |
| 95+ years   | Both   | 2021 | 402636 (383523-421749) |
| 95+ years   | Both   | 2022 | 406221 (380178-432263) |
| 95+ years   | Both   | 2023 | 407446 (373096-441796) |
| 95+ years   | Both   | 2024 | 416140 (371420-460860) |
| 95+ years   | Both   | 2025 | 424752 (368154-481349) |
| 95+ years   | Both   | 2026 | 429696 (360421-498970) |
| 95+ years   | Both   | 2027 | 429684 (347562-511805) |
| 95+ years   | Both   | 2028 | 429893 (334068-525718) |
| 95+ years   | Both   | 2029 | 434115 (322722-545508) |
| 95+ years   | Both   | 2030 | 440742 (311955-569529) |
| 95+ years   | Female | 2020 | 285591 (275713-295468) |
| 95+ years   | Female | 2021 | 301563 (287690-315436) |
| 95+ years   | Female | 2022 | 303426 (284651-322200) |
| 95+ years   | Female | 2023 | 302606 (278060-327152) |
| 95+ years   | Female | 2024 | 306662 (275031-338293) |
| 95+ years   | Female | 2025 | 310841 (271159-350524) |
| 95+ years   | Female | 2026 | 312767 (264526-361009) |
| 95+ years   | Female | 2027 | 311537 (254634-368439) |
| 95+ years   | Female | 2028 | 310198 (244192-376204) |
| 95+ years   | Female | 2029 | 311271 (235119-387423) |
| 95+ years   | Female | 2030 | 314029 (226646-401412) |
| 95+ years   | Male   | 2020 | 94315 (90706-97923)    |

---

|           |      |      |                       |
|-----------|------|------|-----------------------|
| 95+ years | Male | 2021 | 101073 (95833-106313) |
| 95+ years | Male | 2022 | 102795 (95526-110063) |
| 95+ years | Male | 2023 | 104840 (95036-114643) |
| 95+ years | Male | 2024 | 109478 (96389-122567) |
| 95+ years | Male | 2025 | 113910 (96996-130825) |
| 95+ years | Male | 2026 | 116928 (95896-137961) |
| 95+ years | Male | 2027 | 118147 (92928-143366) |
| 95+ years | Male | 2028 | 119696 (89877-149515) |
| 95+ years | Male | 2029 | 122844 (87603-158085) |
| 95+ years | Male | 2030 | 126713 (85309-168117) |

The Bayesian age-period cohort (BAPC) model was used to predict the values of number of prevalent cases from 2020 to 2030. CI = confidence interval.

**eTable 4. Predicted dementia prevalence rates among US oldest-old adults in the four age groups from 2020 to 2030**

| <b>Age groups</b> | <b>Sex</b> | <b>Year</b> | <b>Predicted values<br/>(95% CI, per 100,000)</b> |
|-------------------|------------|-------------|---------------------------------------------------|
| 80-84 years       | Both       | 2020        | 14657 (14055-15258)                               |
| 80-84 years       | Both       | 2021        | 14639 (13810-15468)                               |
| 80-84 years       | Both       | 2022        | 14624 (13493-15754)                               |
| 80-84 years       | Both       | 2023        | 14611 (13123-16099)                               |
| 80-84 years       | Both       | 2024        | 14603 (12711-16495)                               |
| 80-84 years       | Both       | 2025        | 14599 (12263-16935)                               |
| 80-84 years       | Both       | 2026        | 14601 (11783-17419)                               |
| 80-84 years       | Both       | 2027        | 14609 (11274-17945)                               |
| 80-84 years       | Both       | 2028        | 14625 (10738-18513)                               |
| 80-84 years       | Both       | 2029        | 14649 (10175-19124)                               |
| 80-84 years       | Both       | 2030        | 14682 (9584-19780)                                |
| 80-84 years       | Female     | 2020        | 15584 (14974-16211)                               |
| 80-84 years       | Female     | 2021        | 15571 (14737-16435)                               |
| 80-84 years       | Female     | 2022        | 15559 (14433-16743)                               |
| 80-84 years       | Female     | 2023        | 15551 (14084-17120)                               |
| 80-84 years       | Female     | 2024        | 15547 (13702-17557)                               |
| 80-84 years       | Female     | 2025        | 15546 (13296-18052)                               |
| 80-84 years       | Female     | 2026        | 15551 (12873-18603)                               |
| 80-84 years       | Female     | 2027        | 15562 (12437-19211)                               |
| 80-84 years       | Female     | 2028        | 15578 (11993-19877)                               |
| 80-84 years       | Female     | 2029        | 15602 (11543-20604)                               |
| 80-84 years       | Female     | 2030        | 15634 (11091-21394)                               |
| 80-84 years       | Male       | 2020        | 13410 (12841-13996)                               |
| 80-84 years       | Male       | 2021        | 13395 (12607-14215)                               |
| 80-84 years       | Male       | 2022        | 13384 (12309-14519)                               |
| 80-84 years       | Male       | 2023        | 13375 (11967-14891)                               |
| 80-84 years       | Male       | 2024        | 13370 (11595-15325)                               |
| 80-84 years       | Male       | 2025        | 13371 (11202-15817)                               |
| 80-84 years       | Male       | 2026        | 13377 (10794-16369)                               |
| 80-84 years       | Male       | 2027        | 13389 (10376-16980)                               |
| 80-84 years       | Male       | 2028        | 13408 (9951-17653)                                |
| 80-84 years       | Male       | 2029        | 13436 (9524-18391)                                |
| 80-84 years       | Male       | 2030        | 13472 (9098-19198)                                |
| 85-89 years       | Both       | 2020        | 23477 (22636-24318)                               |
| 85-89 years       | Both       | 2021        | 23448 (22325-24571)                               |
| 85-89 years       | Both       | 2022        | 23421 (21908-24934)                               |
| 85-89 years       | Both       | 2023        | 23395 (21408-25382)                               |
| 85-89 years       | Both       | 2024        | 23371 (20837-25906)                               |

---

|             |        |      |                     |
|-------------|--------|------|---------------------|
| 85-89 years | Both   | 2025 | 23353 (20199-26508) |
| 85-89 years | Both   | 2026 | 23343 (19503-27183) |
| 85-89 years | Both   | 2027 | 23342 (18755-27929) |
| 85-89 years | Both   | 2028 | 23350 (17958-28742) |
| 85-89 years | Both   | 2029 | 23367 (17113-29622) |
| 85-89 years | Both   | 2030 | 23397 (16224-30571) |
| 85-89 years | Female | 2020 | 25126 (24266-26006) |
| 85-89 years | Female | 2021 | 25112 (23973-26284) |
| 85-89 years | Female | 2022 | 25097 (23576-26679) |
| 85-89 years | Female | 2023 | 25082 (23101-27170) |
| 85-89 years | Female | 2024 | 25069 (22565-27752) |
| 85-89 years | Female | 2025 | 25062 (21977-28430) |
| 85-89 years | Female | 2026 | 25061 (21349-29201) |
| 85-89 years | Female | 2027 | 25068 (20690-30063) |
| 85-89 years | Female | 2028 | 25084 (20007-31017) |
| 85-89 years | Female | 2029 | 25110 (19309-32066) |
| 85-89 years | Female | 2030 | 25147 (18600-33213) |
| 85-89 years | Male   | 2020 | 20898 (20116-21700) |
| 85-89 years | Male   | 2021 | 20883 (19823-21978) |
| 85-89 years | Male   | 2022 | 20869 (19429-22373) |
| 85-89 years | Male   | 2023 | 20854 (18963-22862) |
| 85-89 years | Male   | 2024 | 20842 (18443-23440) |
| 85-89 years | Male   | 2025 | 20836 (17878-24111) |
| 85-89 years | Male   | 2026 | 20838 (17280-24875) |
| 85-89 years | Male   | 2027 | 20848 (16657-25730) |
| 85-89 years | Male   | 2028 | 20868 (16019-26679) |
| 85-89 years | Male   | 2029 | 20900 (15370-27726) |
| 85-89 years | Male   | 2030 | 20944 (14716-28876) |
| 90-94 years | Both   | 2020 | 35125 (33875-36374) |
| 90-94 years | Both   | 2021 | 35078 (33403-36752) |
| 90-94 years | Both   | 2022 | 35043 (32780-37305) |
| 90-94 years | Both   | 2023 | 35012 (32038-37985) |
| 90-94 years | Both   | 2024 | 34979 (31193-38765) |
| 90-94 years | Both   | 2025 | 34952 (30264-39640) |
| 90-94 years | Both   | 2026 | 34934 (29269-40600) |
| 90-94 years | Both   | 2027 | 34929 (28219-41638) |
| 90-94 years | Both   | 2028 | 34931 (27113-42750) |
| 90-94 years | Both   | 2029 | 34941 (25943-43940) |
| 90-94 years | Both   | 2030 | 34967 (24707-45226) |
| 90-94 years | Female | 2020 | 37590 (36308-38902) |
| 90-94 years | Female | 2021 | 37587 (35881-39345) |
| 90-94 years | Female | 2022 | 37583 (35292-39966) |

---

---

|             |        |      |                     |
|-------------|--------|------|---------------------|
| 90-94 years | Female | 2023 | 37578 (34589-40730) |
| 90-94 years | Female | 2024 | 37576 (33804-41621) |
| 90-94 years | Female | 2025 | 37581 (32955-42633) |
| 90-94 years | Female | 2026 | 37592 (32061-43752) |
| 90-94 years | Female | 2027 | 37607 (31135-44972) |
| 90-94 years | Female | 2028 | 37628 (30182-46294) |
| 90-94 years | Female | 2029 | 37658 (29207-47730) |
| 90-94 years | Female | 2030 | 37703 (28210-49303) |
| 90-94 years | Male   | 2020 | 30348 (29215-31511) |
| 90-94 years | Male   | 2021 | 30334 (28790-31928) |
| 90-94 years | Male   | 2022 | 30319 (28216-32516) |
| 90-94 years | Male   | 2023 | 30305 (27540-33242) |
| 90-94 years | Male   | 2024 | 30297 (26793-34092) |
| 90-94 years | Male   | 2025 | 30301 (25996-35066) |
| 90-94 years | Male   | 2026 | 30315 (25164-36152) |
| 90-94 years | Male   | 2027 | 30336 (24306-37342) |
| 90-94 years | Male   | 2028 | 30364 (23428-38639) |
| 90-94 years | Male   | 2029 | 30402 (22535-40054) |
| 90-94 years | Male   | 2030 | 30456 (21631-41608) |
| 95+ years   | Both   | 2020 | 56892 (54873-58912) |
| 95+ years   | Both   | 2021 | 56798 (54102-59495) |
| 95+ years   | Both   | 2022 | 56735 (53098-60372) |
| 95+ years   | Both   | 2023 | 56668 (51891-61446) |
| 95+ years   | Both   | 2024 | 56609 (50526-62693) |
| 95+ years   | Both   | 2025 | 56582 (49043-64122) |
| 95+ years   | Both   | 2026 | 56579 (47458-65701) |
| 95+ years   | Both   | 2027 | 56597 (45780-67414) |
| 95+ years   | Both   | 2028 | 56618 (43998-69239) |
| 95+ years   | Both   | 2029 | 56645 (42110-71179) |
| 95+ years   | Both   | 2030 | 56696 (40129-73262) |
| 95+ years   | Female | 2020 | 59920 (57879-62007) |
| 95+ years   | Female | 2021 | 59862 (57148-62656) |
| 95+ years   | Female | 2022 | 59825 (56184-63614) |
| 95+ years   | Female | 2023 | 59813 (55061-64826) |
| 95+ years   | Female | 2024 | 59827 (53824-66263) |
| 95+ years   | Female | 2025 | 59865 (52495-67913) |
| 95+ years   | Female | 2026 | 59912 (51089-69741) |
| 95+ years   | Female | 2027 | 59965 (49625-71734) |
| 95+ years   | Female | 2028 | 60027 (48117-73896) |
| 95+ years   | Female | 2029 | 60105 (46575-76239) |
| 95+ years   | Female | 2030 | 60203 (45009-78780) |
| 95+ years   | Male   | 2020 | 49343 (47501-51230) |

---



|           |      |      |                     |
|-----------|------|------|---------------------|
| 95+ years | Male | 2021 | 49276 (46771-51861) |
| 95+ years | Male | 2022 | 49228 (45817-52792) |
| 95+ years | Male | 2023 | 49202 (44716-53966) |
| 95+ years | Male | 2024 | 49198 (43510-55359) |
| 95+ years | Male | 2025 | 49218 (42224-56959) |
| 95+ years | Male | 2026 | 49252 (40876-58745) |
| 95+ years | Male | 2027 | 49296 (39482-60704) |
| 95+ years | Male | 2028 | 49354 (38055-62843) |
| 95+ years | Male | 2029 | 49433 (36610-65178) |
| 95+ years | Male | 2030 | 49543 (35157-67732) |

The Bayesian age-period cohort (BAPC) model was used to predict the values of prevalence rate from 2020 to 2030. CI = confidence interval.

**eTable 5. Predicted dementia mortality numbers among US oldest-old adults in the four age groups from 2020 to 2030**

| Age groups  | Sex    | Year | Predicted values<br>(95% CI) |
|-------------|--------|------|------------------------------|
| 80-84 years | Both   | 2020 | 22782 (21596-23969)          |
| 80-84 years | Both   | 2021 | 23560 (21852-25267)          |
| 80-84 years | Both   | 2022 | 24482 (22038-26927)          |
| 80-84 years | Both   | 2023 | 25624 (22228-29019)          |
| 80-84 years | Both   | 2024 | 26995 (22419-31571)          |
| 80-84 years | Both   | 2025 | 28512 (22515-34510)          |
| 80-84 years | Both   | 2026 | 30101 (22435-37767)          |
| 80-84 years | Both   | 2027 | 31695 (22113-41277)          |
| 80-84 years | Both   | 2028 | 33365 (21581-45148)          |
| 80-84 years | Both   | 2029 | 35173 (20849-49496)          |
| 80-84 years | Both   | 2030 | 37044 (19835-54252)          |
| 80-84 years | Female | 2020 | 14039 (13353-14726)          |
| 80-84 years | Female | 2021 | 14475 (13492-15459)          |
| 80-84 years | Female | 2022 | 14999 (13597-16400)          |
| 80-84 years | Female | 2023 | 15651 (13713-17589)          |
| 80-84 years | Female | 2024 | 16435 (13835-19036)          |
| 80-84 years | Female | 2025 | 17305 (13912-20698)          |
| 80-84 years | Female | 2026 | 18217 (13897-22537)          |
| 80-84 years | Female | 2027 | 19135 (13754-24516)          |
| 80-84 years | Female | 2028 | 20101 (13504-26698)          |
| 80-84 years | Female | 2029 | 21152 (13156-29147)          |
| 80-84 years | Female | 2030 | 22236 (12659-31813)          |
| 80-84 years | Male   | 2020 | 8743 (8243-9243)             |
| 80-84 years | Male   | 2021 | 9085 (8361-9808)             |
| 80-84 years | Male   | 2022 | 9483 (8440-10526)            |
| 80-84 years | Male   | 2023 | 9973 (8515-11430)            |
| 80-84 years | Male   | 2024 | 10559 (8583-12536)           |
| 80-84 years | Male   | 2025 | 11207 (8603-13812)           |
| 80-84 years | Male   | 2026 | 11884 (8538-15230)           |
| 80-84 years | Male   | 2027 | 12560 (8359-16761)           |
| 80-84 years | Male   | 2028 | 13263 (8077-18450)           |
| 80-84 years | Male   | 2029 | 14021 (7693-20349)           |
| 80-84 years | Male   | 2030 | 14808 (7177-22439)           |
| 85-89 years | Both   | 2020 | 33842 (32331-35353)          |
| 85-89 years | Both   | 2021 | 34103 (31983-36223)          |
| 85-89 years | Both   | 2022 | 34636 (31648-37625)          |
| 85-89 years | Both   | 2023 | 35403 (31317-39490)          |
| 85-89 years | Both   | 2024 | 36372 (30957-41788)          |

---

|             |        |      |                     |
|-------------|--------|------|---------------------|
| 85-89 years | Both   | 2025 | 37573 (30568-44578) |
| 85-89 years | Both   | 2026 | 39017 (30133-47900) |
| 85-89 years | Both   | 2027 | 40709 (29620-51799) |
| 85-89 years | Both   | 2028 | 42807 (29089-56525) |
| 85-89 years | Both   | 2029 | 45345 (28484-62206) |
| 85-89 years | Both   | 2030 | 48165 (27623-68707) |
| 85-89 years | Female | 2020 | 22207 (21278-23135) |
| 85-89 years | Female | 2021 | 22270 (20979-23561) |
| 85-89 years | Female | 2022 | 22526 (20718-24334) |
| 85-89 years | Female | 2023 | 22938 (20479-25396) |
| 85-89 years | Female | 2024 | 23469 (20228-26710) |
| 85-89 years | Female | 2025 | 24142 (19970-28314) |
| 85-89 years | Female | 2026 | 24967 (19701-30233) |
| 85-89 years | Female | 2027 | 25951 (19406-32496) |
| 85-89 years | Female | 2028 | 27178 (19119-35238) |
| 85-89 years | Female | 2029 | 28663 (18808-38517) |
| 85-89 years | Female | 2030 | 30313 (18370-42257) |
| 85-89 years | Male   | 2020 | 11636 (11053-12218) |
| 85-89 years | Male   | 2021 | 11833 (11004-12661) |
| 85-89 years | Male   | 2022 | 12110 (10930-13291) |
| 85-89 years | Male   | 2023 | 12465 (10837-14093) |
| 85-89 years | Male   | 2024 | 12903 (10729-15078) |
| 85-89 years | Male   | 2025 | 13431 (10597-16264) |
| 85-89 years | Male   | 2026 | 14050 (10432-17667) |
| 85-89 years | Male   | 2027 | 14759 (10214-19303) |
| 85-89 years | Male   | 2028 | 15629 (9970-21288)  |
| 85-89 years | Male   | 2029 | 16683 (9676-23689)  |
| 85-89 years | Male   | 2030 | 17851 (9253-26450)  |
| 90-94 years | Both   | 2020 | 37499 (35851-39146) |
| 90-94 years | Both   | 2021 | 37287 (34991-39582) |
| 90-94 years | Both   | 2022 | 37216 (34027-40406) |
| 90-94 years | Both   | 2023 | 37173 (32909-41436) |
| 90-94 years | Both   | 2024 | 37170 (31680-42661) |
| 90-94 years | Both   | 2025 | 37367 (30478-44255) |
| 90-94 years | Both   | 2026 | 37827 (29350-46305) |
| 90-94 years | Both   | 2027 | 38566 (28279-48853) |
| 90-94 years | Both   | 2028 | 39581 (27224-51938) |
| 90-94 years | Both   | 2029 | 40884 (26138-55630) |
| 90-94 years | Both   | 2030 | 42491 (24969-60013) |
| 90-94 years | Female | 2020 | 26718 (25614-27822) |
| 90-94 years | Female | 2021 | 26363 (24838-27887) |
| 90-94 years | Female | 2022 | 26175 (24069-28280) |

---

---

|             |        |      |                     |
|-------------|--------|------|---------------------|
| 90-94 years | Female | 2023 | 26028 (23228-28827) |
| 90-94 years | Female | 2024 | 25884 (22302-29465) |
| 90-94 years | Female | 2025 | 25871 (21408-30334) |
| 90-94 years | Female | 2026 | 26049 (20592-31505) |
| 90-94 years | Female | 2027 | 26439 (19854-33024) |
| 90-94 years | Female | 2028 | 27018 (19150-34885) |
| 90-94 years | Female | 2029 | 27770 (18440-37100) |
| 90-94 years | Female | 2030 | 28714 (17700-39729) |
| 90-94 years | Male   | 2020 | 10781 (10237-11325) |
| 90-94 years | Male   | 2021 | 10924 (10153-11695) |
| 90-94 years | Male   | 2022 | 11041 (9957-12125)  |
| 90-94 years | Male   | 2023 | 11145 (9681-12610)  |
| 90-94 years | Male   | 2024 | 11286 (9377-13195)  |
| 90-94 years | Male   | 2025 | 11496 (9070-13921)  |
| 90-94 years | Male   | 2026 | 11779 (8758-14799)  |
| 90-94 years | Male   | 2027 | 12127 (8425-15829)  |
| 90-94 years | Male   | 2028 | 12563 (8073-17053)  |
| 90-94 years | Male   | 2029 | 13114 (7698-18530)  |
| 90-94 years | Male   | 2030 | 13777 (7269-20284)  |
| 95+ years   | Both   | 2020 | 24699 (23596-25802) |
| 95+ years   | Both   | 2021 | 26129 (24522-27736) |
| 95+ years   | Both   | 2022 | 26300 (24063-28536) |
| 95+ years   | Both   | 2023 | 26298 (23312-29284) |
| 95+ years   | Both   | 2024 | 26764 (22854-30675) |
| 95+ years   | Both   | 2025 | 27221 (22258-32184) |
| 95+ years   | Both   | 2026 | 27458 (21370-33545) |
| 95+ years   | Both   | 2027 | 27403 (20170-34635) |
| 95+ years   | Both   | 2028 | 27390 (18925-35854) |
| 95+ years   | Both   | 2029 | 27661 (17785-37537) |
| 95+ years   | Both   | 2030 | 28112 (16642-39582) |
| 95+ years   | Female | 2020 | 19140 (18336-19943) |
| 95+ years   | Female | 2021 | 20167 (18994-21340) |
| 95+ years   | Female | 2022 | 20234 (18602-21866) |
| 95+ years   | Female | 2023 | 20114 (17948-22280) |
| 95+ years   | Female | 2024 | 20311 (17498-23124) |
| 95+ years   | Female | 2025 | 20513 (16970-24055) |
| 95+ years   | Female | 2026 | 20575 (16258-24891) |
| 95+ years   | Female | 2027 | 20446 (15344-25549) |
| 95+ years   | Female | 2028 | 20335 (14400-26271) |
| 95+ years   | Female | 2029 | 20408 (13536-27281) |
| 95+ years   | Female | 2030 | 20615 (12693-28536) |
| 95+ years   | Male   | 2020 | 5559 (5260-5858)    |

---

---

|           |      |      |                   |
|-----------|------|------|-------------------|
| 95+ years | Male | 2021 | 5962 (5529-6396)  |
| 95+ years | Male | 2022 | 6065 (5461-6670)  |
| 95+ years | Male | 2023 | 6184 (5365-7004)  |
| 95+ years | Male | 2024 | 6453 (5356-7550)  |
| 95+ years | Male | 2025 | 6708 (5288-8129)  |
| 95+ years | Male | 2026 | 6883 (5112-8654)  |
| 95+ years | Male | 2027 | 6956 (4826-9086)  |
| 95+ years | Male | 2028 | 7055 (4526-9584)  |
| 95+ years | Male | 2029 | 7252 (4249-10256) |
| 95+ years | Male | 2030 | 7497 (3948-11046) |

---

The Bayesian age-period cohort (BAPC) model was used to predict the values of number of mortality numbers from 2020 to 2030. CI = confidence interval.

**eTable 6. Predicted dementia mortality rates among US oldest-old adults in the four age groups from 2020 to 2030**

| <b>Age groups</b> | <b>Sex</b> | <b>Year</b> | <b>Predicted values<br/>(95% CI, per 100,000)</b> |
|-------------------|------------|-------------|---------------------------------------------------|
| 80-84 years       | Both       | 2020        | 364 (345-383)                                     |
| 80-84 years       | Both       | 2021        | 363 (337-390)                                     |
| 80-84 years       | Both       | 2022        | 363 (327-399)                                     |
| 80-84 years       | Both       | 2023        | 363 (315-411)                                     |
| 80-84 years       | Both       | 2024        | 363 (301-424)                                     |
| 80-84 years       | Both       | 2025        | 363 (286-439)                                     |
| 80-84 years       | Both       | 2026        | 363 (271-456)                                     |
| 80-84 years       | Both       | 2027        | 364 (254-474)                                     |
| 80-84 years       | Both       | 2028        | 365 (236-494)                                     |
| 80-84 years       | Both       | 2029        | 366 (217-515)                                     |
| 80-84 years       | Both       | 2030        | 368 (197-539)                                     |
| 80-84 years       | Female     | 2020        | 391 (373-409)                                     |
| 80-84 years       | Female     | 2021        | 390 (365-417)                                     |
| 80-84 years       | Female     | 2022        | 390 (355-427)                                     |
| 80-84 years       | Female     | 2023        | 390 (344-440)                                     |
| 80-84 years       | Female     | 2024        | 390 (332-455)                                     |
| 80-84 years       | Female     | 2025        | 390 (319-472)                                     |
| 80-84 years       | Female     | 2026        | 390 (306-491)                                     |
| 80-84 years       | Female     | 2027        | 391 (292-512)                                     |
| 80-84 years       | Female     | 2028        | 392 (278-536)                                     |
| 80-84 years       | Female     | 2029        | 393 (265-562)                                     |
| 80-84 years       | Female     | 2030        | 395 (251-591)                                     |
| 80-84 years       | Male       | 2020        | 327 (310-345)                                     |
| 80-84 years       | Male       | 2021        | 327 (302-353)                                     |
| 80-84 years       | Male       | 2022        | 327 (293-364)                                     |
| 80-84 years       | Male       | 2023        | 327 (282-377)                                     |
| 80-84 years       | Male       | 2024        | 327 (270-392)                                     |
| 80-84 years       | Male       | 2025        | 327 (258-410)                                     |
| 80-84 years       | Male       | 2026        | 328 (245-430)                                     |
| 80-84 years       | Male       | 2027        | 329 (232-453)                                     |
| 80-84 years       | Male       | 2028        | 330 (220-478)                                     |
| 80-84 years       | Male       | 2029        | 332 (207-506)                                     |
| 80-84 years       | Male       | 2030        | 334 (194-537)                                     |
| 85-89 years       | Both       | 2020        | 887 (847-927)                                     |
| 85-89 years       | Both       | 2021        | 886 (831-941)                                     |
| 85-89 years       | Both       | 2022        | 885 (808-961)                                     |
| 85-89 years       | Both       | 2023        | 884 (782-986)                                     |
| 85-89 years       | Both       | 2024        | 883 (752-1015)                                    |

---

|             |        |      |                  |
|-------------|--------|------|------------------|
| 85-89 years | Both   | 2025 | 883 (718-1048)   |
| 85-89 years | Both   | 2026 | 883 (682-1084)   |
| 85-89 years | Both   | 2027 | 884 (643-1125)   |
| 85-89 years | Both   | 2028 | 886 (602-1170)   |
| 85-89 years | Both   | 2029 | 888 (558-1218)   |
| 85-89 years | Both   | 2030 | 891 (511-1272)   |
| 85-89 years | Female | 2020 | 954 (917-993)    |
| 85-89 years | Female | 2021 | 954 (901-1009)   |
| 85-89 years | Female | 2022 | 953 (879-1031)   |
| 85-89 years | Female | 2023 | 953 (855-1059)   |
| 85-89 years | Female | 2024 | 952 (827-1091)   |
| 85-89 years | Female | 2025 | 952 (797-1128)   |
| 85-89 years | Female | 2026 | 953 (766-1171)   |
| 85-89 years | Female | 2027 | 954 (734-1219)   |
| 85-89 years | Female | 2028 | 956 (702-1272)   |
| 85-89 years | Female | 2029 | 958 (669-1330)   |
| 85-89 years | Female | 2030 | 961 (636-1395)   |
| 85-89 years | Male   | 2020 | 782 (746-819)    |
| 85-89 years | Male   | 2021 | 781 (729-835)    |
| 85-89 years | Male   | 2022 | 780 (708-858)    |
| 85-89 years | Male   | 2023 | 780 (683-887)    |
| 85-89 years | Male   | 2024 | 780 (657-920)    |
| 85-89 years | Male   | 2025 | 781 (628-959)    |
| 85-89 years | Male   | 2026 | 782 (599-1004)   |
| 85-89 years | Male   | 2027 | 784 (569-1054)   |
| 85-89 years | Male   | 2028 | 786 (539-1110)   |
| 85-89 years | Male   | 2029 | 790 (509-1173)   |
| 85-89 years | Male   | 2030 | 794 (479-1243)   |
| 90-94 years | Both   | 2020 | 1905 (1821-1988) |
| 90-94 years | Both   | 2021 | 1895 (1779-2012) |
| 90-94 years | Both   | 2022 | 1888 (1727-2050) |
| 90-94 years | Both   | 2023 | 1883 (1667-2099) |
| 90-94 years | Both   | 2024 | 1880 (1602-2157) |
| 90-94 years | Both   | 2025 | 1878 (1532-2224) |
| 90-94 years | Both   | 2026 | 1878 (1457-2299) |
| 90-94 years | Both   | 2027 | 1879 (1378-2381) |
| 90-94 years | Both   | 2028 | 1882 (1294-2470) |
| 90-94 years | Both   | 2029 | 1886 (1206-2566) |
| 90-94 years | Both   | 2030 | 1891 (1111-2671) |
| 90-94 years | Female | 2020 | 2057 (1977-2140) |
| 90-94 years | Female | 2021 | 2049 (1935-2168) |
| 90-94 years | Female | 2022 | 2042 (1884-2210) |

---

---

|             |        |      |                  |
|-------------|--------|------|------------------|
| 90-94 years | Female | 2023 | 2037 (1827-2265) |
| 90-94 years | Female | 2024 | 2035 (1767-2332) |
| 90-94 years | Female | 2025 | 2035 (1704-2411) |
| 90-94 years | Female | 2026 | 2037 (1641-2500) |
| 90-94 years | Female | 2027 | 2040 (1575-2598) |
| 90-94 years | Female | 2028 | 2043 (1509-2706) |
| 90-94 years | Female | 2029 | 2048 (1442-2825) |
| 90-94 years | Female | 2030 | 2054 (1374-2955) |
| 90-94 years | Male   | 2020 | 1609 (1534-1685) |
| 90-94 years | Male   | 2021 | 1605 (1498-1717) |
| 90-94 years | Male   | 2022 | 1602 (1453-1763) |
| 90-94 years | Male   | 2023 | 1600 (1401-1821) |
| 90-94 years | Male   | 2024 | 1600 (1346-1888) |
| 90-94 years | Male   | 2025 | 1600 (1288-1966) |
| 90-94 years | Male   | 2026 | 1601 (1228-2054) |
| 90-94 years | Male   | 2027 | 1604 (1168-2153) |
| 90-94 years | Male   | 2028 | 1609 (1108-2264) |
| 90-94 years | Male   | 2029 | 1616 (1049-2386) |
| 90-94 years | Male   | 2030 | 1624 (990-2523)  |
| 95+ years   | Both   | 2020 | 3699 (3534-3864) |
| 95+ years   | Both   | 2021 | 3686 (3459-3913) |
| 95+ years   | Both   | 2022 | 3673 (3361-3985) |
| 95+ years   | Both   | 2023 | 3658 (3242-4073) |
| 95+ years   | Both   | 2024 | 3641 (3109-4173) |
| 95+ years   | Both   | 2025 | 3626 (2965-4287) |
| 95+ years   | Both   | 2026 | 3615 (2814-4417) |
| 95+ years   | Both   | 2027 | 3609 (2657-4562) |
| 95+ years   | Both   | 2028 | 3607 (2493-4722) |
| 95+ years   | Both   | 2029 | 3609 (2321-4898) |
| 95+ years   | Both   | 2030 | 3616 (2141-5092) |
| 95+ years   | Female | 2020 | 4016 (3859-4177) |
| 95+ years   | Female | 2021 | 4003 (3781-4235) |
| 95+ years   | Female | 2022 | 3990 (3680-4318) |
| 95+ years   | Female | 2023 | 3976 (3565-4420) |
| 95+ years   | Female | 2024 | 3962 (3440-4541) |
| 95+ years   | Female | 2025 | 3951 (3308-4680) |
| 95+ years   | Female | 2026 | 3941 (3174-4838) |
| 95+ years   | Female | 2027 | 3936 (3038-5015) |
| 95+ years   | Female | 2028 | 3935 (2904-5215) |
| 95+ years   | Female | 2029 | 3941 (2773-5439) |
| 95+ years   | Female | 2030 | 3952 (2643-5690) |
| 95+ years   | Male   | 2020 | 2908 (2774-3048) |

---



|           |      |      |                  |
|-----------|------|------|------------------|
| 95+ years | Male | 2021 | 2907 (2713-3111) |
| 95+ years | Male | 2022 | 2905 (2633-3197) |
| 95+ years | Male | 2023 | 2902 (2541-3302) |
| 95+ years | Male | 2024 | 2900 (2440-3424) |
| 95+ years | Male | 2025 | 2899 (2333-3563) |
| 95+ years | Male | 2026 | 2899 (2223-3720) |
| 95+ years | Male | 2027 | 2902 (2112-3897) |
| 95+ years | Male | 2028 | 2909 (2002-4094) |
| 95+ years | Male | 2029 | 2918 (1893-4314) |
| 95+ years | Male | 2030 | 2931 (1785-4557) |

The Bayesian age-period cohort (BAPC) model was used to predict the values of mortality rate from 2020 to 2030. CI = confidence interval.

## Supplementary method

### Decomposition Analysis

The aging of population, population growth, and epidemiological change are commonly used population-level factors in decomposition analysis to gain their net contribution to the changes of prevalence and mortality at the population level. The aging of the population is typically approximated as changes in age structure. The population growth refers to the increase of the total population number. For the decomposition analysis for prevalence, the epidemiological change refers to change in prevalence rate; for the decomposition analysis for mortality, the epidemiological change refers to change in mortality rate.

In the decomposition analysis, here, taking prevalence as an example, the number of prevalence was obtained from the following equation:

$$\text{Prevalence}_{ay, py, ey} = \sum_{i=1}^4 (a_{i,y} * p_y * e_{i,y}).$$

Where  $\text{Prevalence}_{ay, py, ey}$  represented prevalence based on the factors of aging of population, population growth, and prevalence rate of dementia for specific year  $y$ .

Specifically,  $a_{i,y}$  represents the proportion of population for the age category  $i$  of the 4 age categories (80-84 years, 85-89 years, 90-94 years, and 95+ years) in given year  $y$ ;  $p_y$  represents the total population in given year  $y$ ; and  $e_{i,y}$  represents dementia prevalence rate of given age category  $i$  in year  $y$ . The net contribution of each factor to the total changes in prevalence was defined by the effect of one factor changing while the other factors were held constant. The proportions of each factor contributed to the

total changes were calculated using the following formula: the absolute value of proportion = absolute value of change driven by the factor / absolute value of the overall change. The proportion was positive when the change driven by the factor was positive; otherwise, the proportion was negative.

The net contribution of aging of population was calculated as:

$$\begin{aligned} & [(Prevalence_{a2019, p1990, e1990} + Prevalence_{a2019, p2019, e2019})/3 + \\ & (Prevalence_{a2019, p1990, e2019} + Prevalence_{a2019, p2019, e1990})/6] - \\ & [(Prevalence_{a1990, p2019, e2019} + Prevalence_{a1990, p1990, e1990})/3 + \\ & (Prevalence_{a1990, p2019, e1990} + Prevalence_{a1990, p1990, e2019})/6] \end{aligned}$$

The net contribution of population growth was calculated as:

$$\begin{aligned} & [(Prevalence_{a1990, p2019, e1990} + Prevalence_{a2019, p2019, e2019})/3 + \\ & (Prevalence_{a1990, p2019, e2019} + Prevalence_{a2019, p2019, e1990})/6] - \\ & [(Prevalence_{a1990, p1990, e1990} + Prevalence_{a2019, p1990, e2019})/3 + \\ & (Prevalence_{a1990, p1990, e2019} + Prevalence_{a2019, p1990, e1990})/6] \end{aligned}$$

The net contribution of prevalence rate was calculated as:

$$\begin{aligned} & [(Prevalence_{a1990, p1990, e2019} + Prevalence_{a2019, p2019, e2019})/3 + \\ & (Prevalence_{a1990, p2019, e2019} + Prevalence_{a2019, p1990, e1990})/6] - \\ & [(Prevalence_{a1990, p1990, e1990} + Prevalence_{a2019, p2019, e1990})/3 + \\ & (Prevalence_{a1990, p2019, e1990} + Prevalence_{a2019, p1990, e1990})/6] \end{aligned}$$

## References

1. Estimation of the global prevalence of dementia in 2019 and forecasted prevalence in 2050: an analysis for the Global Burden of Disease Study 2019. *The Lancet Public health*. 2022;7(2):e105-e125.
2. Global burden of 87 risk factors in 204 countries and territories, 1990-2019: a systematic analysis for the Global Burden of Disease Study 2019. *Lancet*. 2020;396(10258):1223-1249.
3. Global burden of 369 diseases and injuries in 204 countries and territories, 1990-2019: a systematic analysis for the Global Burden of Disease Study 2019. *Lancet*. 2020;396(10258):1204-1222.
